# Supplementary material for: SIRT1 Inhibition Affects Angiogenic Properties of Human MSCs
Source: Hindawi journal article supplement (doi:10.1155/2014/783459), 2014-01-01

A

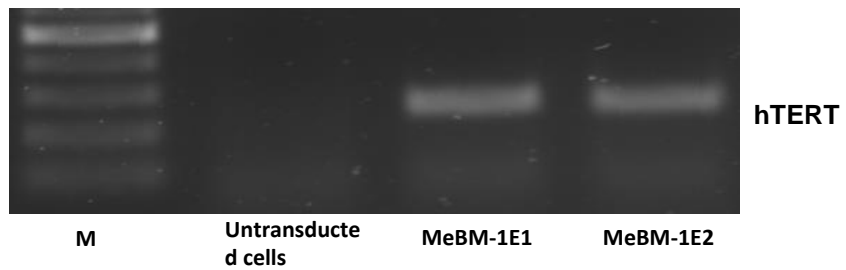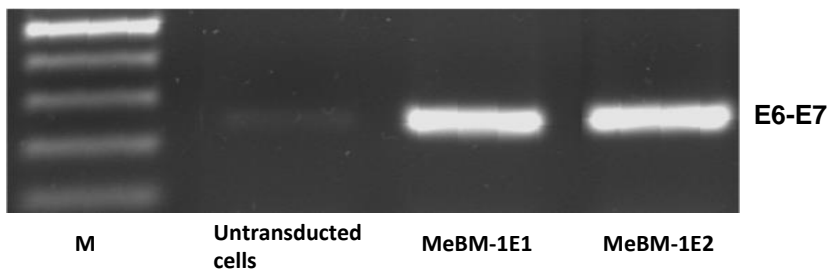

B

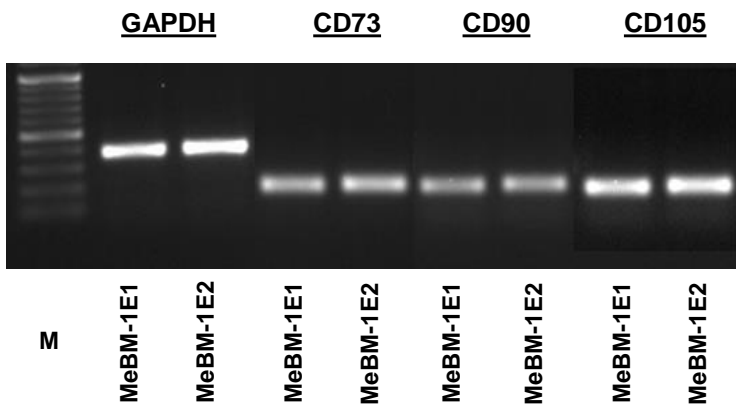

A

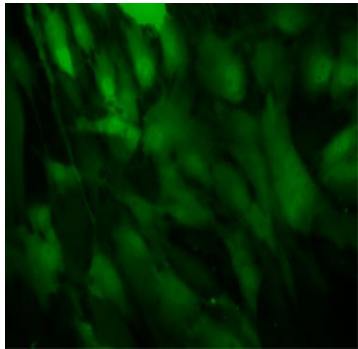

50  $\mu$ m

shsirt1

B

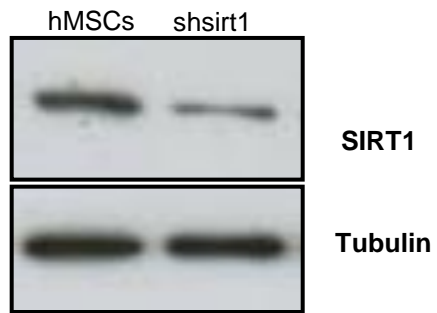

Supplement: f1 [file 783459.f1.pdf]
